# Supplementary material for: Estimation of Garden Chrysanthemum Crown Diameter Using Unmanned Aerial Vehicle (UAV)-Based RGB Imagery
Source: MDPI journal article supplement (doi:10.3390/agronomy14020337), 2024-02-06
Supplement: s1 [file s1]

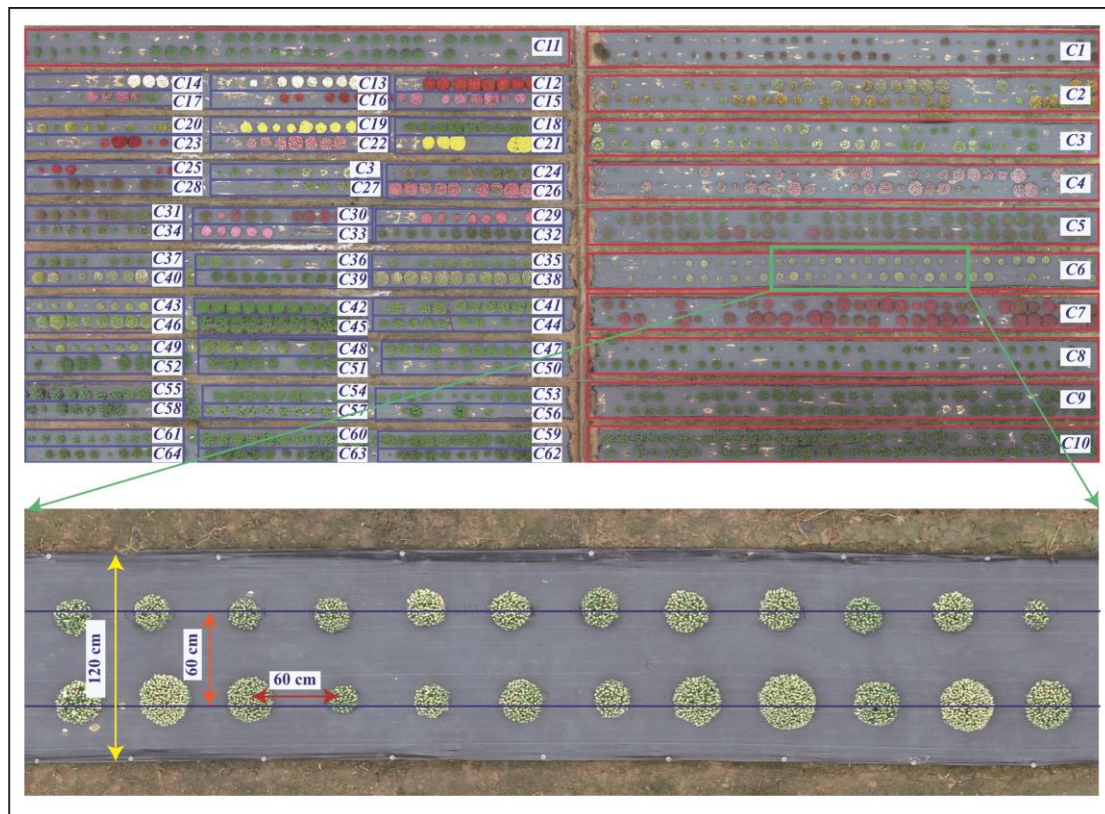

**Figure S1.** Garden chrysanthemum planting map. Seventy and ten plants are grown within the red box and blue box, respectively. Yellow arrow represents bed width, orange arrow represents row spacing, and red arrow represents plant spacing.
