# Supplementary material for: Estimation of Garden Chrysanthemum Crown Diameter Using Unmanned Aerial Vehicle (UAV)-Based RGB Imagery
Source: MDPI journal article supplement (doi:10.3390/agronomy14020337), 2024-02-06
Supplement: s1 [file s1]

Table S1. Sixty-four garden chrysanthemum cultivars.

| Number | Cultivar               | Planting Quantity | Measurement Quantity |
|--------|------------------------|-------------------|----------------------|
| C1     | 'Jinling Zipao'        | 70                | 10                   |
| C2     | 'Jinling Chixin'       | 70                | 10                   |
| C3     | 'Jinling Yuegui'       | 70                | 10                   |
| C4     | 'Jinling Zhifen'       | 70                | 10                   |
| C5     | 'Jinling Guili'        | 70                | 10                   |
| C6     | 'Lingfengbai'          | 70                | 10                   |
| C7     | 'Jinling Lianyan'      | 70                | 10                   |
| C8     | 'Qinhubai'             | 70                | 10                   |
| C9     | 'Zhongshan Chiyan'     | 70                | 10                   |
| C10    | 'Zhongshan Mengzhuang' | 70                | 10                   |
| C11    | 'Zhongshan Yucheng'    | 70                | 10                   |
| C12    | 'Jinling Hongxiu'      | 10                | 3                    |
| C13    | 'Jinling Mixue'        | 10                | 3                    |
| C14    | 'Jinling Yeying'       | 10                | 3                    |
| C15    | 'Jinling Dianchun'     | 10                | 3                    |
| C16    | 'Jinling Honglian'     | 10                | 3                    |
| C17    | 'Jinling Xiaoye'       | 10                | 3                    |
| C18    | 'Zhongshan Siming'     | 10                | 3                    |
| C19    | 'Jinling Mucheng'      | 10                | 3                    |
| C20    | 'Jinling Yangguang'    | 10                | 3                    |
| C21    | 'Jinling Xinghe'       | 10                | 3                    |
| C22    | 'Jinling Yanhe'        | 10                | 3                    |
| C23    | 'Jinling Yipinhong'    | 10                | 3                    |
| C24    | 'Jinling Fenyuan'      | 10                | 3                    |
| C25    | 'Jinling Zizhou'       | 10                | 3                    |
| C26    | 'Jinling Zhiqiu'       | 10                | 3                    |
| C27    | 'Jinling Meiguijin'    | 10                | 3                    |
| C28    | 'Jinling Hongtaiyang'  | 10                | 3                    |
| C29    | 'Jinling Zimei'        | 10                | 3                    |
| C30    | 'Jinling Zixia'        | 10                | 3                    |
| C31    | 'Lingxi Zixing'        | 10                | 3                    |
| C32    | 'Zhongshan Ziduan'     | 10                | 3                    |
| C33    | 'Zhongshan Fanghua'    | 10                | 3                    |
| C34    | 'Zhongshan Mingying'   | 10                | 3                    |
| C35    | 'Zhongshan Fenyan'     | 10                | 3                    |
| C36    | 'Lingxi Cheng'         | 10                | 3                    |
| C37    | 'Lingxi Zi'            | 10                | 3                    |
| C38    | 'Zhongshan Luojin'     | 10                | 3                    |
| C39    | 'Zhongshan Chidie'     | 10                | 3                    |
| C40    | 'Zhongshan Jinfeng'    | 10                | 3                    |
| C41    | 'Lingxi Chenghong'     | 10                | 3                    |
| C42    | 'Zhongshan Jinxing'    | 10                | 3                    |
| C43    | 'Zhongshan Ruiyang'    | 10                | 3                    |
| C44    | 'Lingxi Huang'         | 10                | 3                    |
| C45    | 'Zhongshan Hongyun'    | 10                | 3                    |
| C46    | 'Zhongshan Qinghe'     | 10                | 3                    |
| C47    | 'Zhongshan Sihua'      | 10                | 3                    |
| C48    | 'Lingxi Bai'           | 10                | 3                    |
| C49    | 'Zhongshan Jinniukou'  | 10                | 3                    |

---

|     |                       |    |   |
|-----|-----------------------|----|---|
| C50 | ‘Zhongshan Fendie’    | 10 | 3 |
| C51 | ‘Zhongshan Jinyang’   | 10 | 3 |
| C52 | ‘Zhongshan Zisongguo’ | 10 | 3 |
| C53 | ‘Lingyan Danhuang’    | 10 | 3 |
| C54 | ‘Lingyan Gui’         | 10 | 3 |
| C55 | ‘Qixia Nuanyang’      | 10 | 3 |
| C56 | ‘Zhongshan Molian’    | 10 | 3 |
| C57 | ‘Zhongshan Honghe’    | 10 | 3 |
| C58 | ‘Zhongshan Wuji’      | 10 | 3 |
| C59 | ‘Zhongshan Xuegui’    | 10 | 3 |
| C60 | ‘Qixia Hongyi’        | 10 | 3 |
| C61 | ‘Zhongshan Jinmang’   | 10 | 3 |
| C62 | ‘Qingfeng Fenzi’      | 10 | 3 |
| C63 | ‘Qingfeng Yanghong’   | 10 | 3 |
| C64 | ‘Qingfeng Taoli’      | 10 | 3 |

---
